# Supplementary material for: Tumor-Associated Macrophages Affect the Tumor Microenvironment and Radioresistance via the Upregulation of CXCL6/CXCR2 in Hepatocellular Carcinoma
Source: MDPI journal article supplement (doi:10.3390/biomedicines11072081), 2023-07-24
Supplement: s1 [file s1]

## Supplementary Data

Supplementary Table S1. List of antibodies and dilution used.

| No. | Target               | Dilution | Catalog                                                      | kDa  |
|-----|----------------------|----------|--------------------------------------------------------------|------|
| 1   | GAPDH                | 1:1000   | GAPDH (0411K) Mouse mAb SC-27724                             | 37   |
| 2   | CXCR2                | 1:1000   | Anti-CXCR2 antibody produced in mouse SAB1406027             | 40.8 |
| 3   | CD163                | 1:1000   | Anti-CD163 antibody [EPR19518] (ab182422)                    | 150  |
| 4   | IFN- $\gamma$        | 1:1000   | IFN- $\gamma$ (3F1E3) Mouse mAb #3159                        | 17   |
| 5   | p-NF- $\kappa$ B p65 | 1:1000   | Phospho-NF- $\kappa$ B p65 (Ser536) (93H1) Rabbit mAb #3033  | 65   |
| 6   | NF- $\kappa$ B p65   | 1:1000   | NF- $\kappa$ B p65 (L8F6) Mouse mAb #6956                    | 65   |
| 7   | p-p38 MAPK           | 1:1000   | Phospho-p38 MAPK (Thr180/Tyr182) (D3F9) XP® Rabbit mAb #4511 | 43   |
| 8   | p38 MAPK             | 1:1000   | p38 MAPK (D13E1) XP® Rabbit mAb #8690                        | 40   |
| 9   | CXCL6                | 1:1000   | CXCL6 Antibody (PA5-116670)                                  | 9    |
| 10  | $\gamma$ -H2AXa      | 1:1000   | gamma-H2AX Recombinant Rabbit Monoclonal Antibody (BLR053F)  | 17   |
| 11  | RAD50                | 1:1000   | Rad50 Antibody #3427                                         | 153  |
| 12  | p-Chk2               | 1:1000   | Phospho-Chk2 (Thr68) (C13C1) Rabbit mAb #2197                | 62   |
| 13  | MLH3                 | 1:500    | MLH3 Polyclonal antibody #25298-1-AP Proteintec              | 160  |
| 14  | MSH3                 | 1:500    | Recombinant Anti-MSH3 antibody [RM405] (ab275928)            | 127  |
| 15  | ERCC2                | 1:500    | ERCC2 Polyclonal antibody #10818-1-AP Proteintec             | 80   |

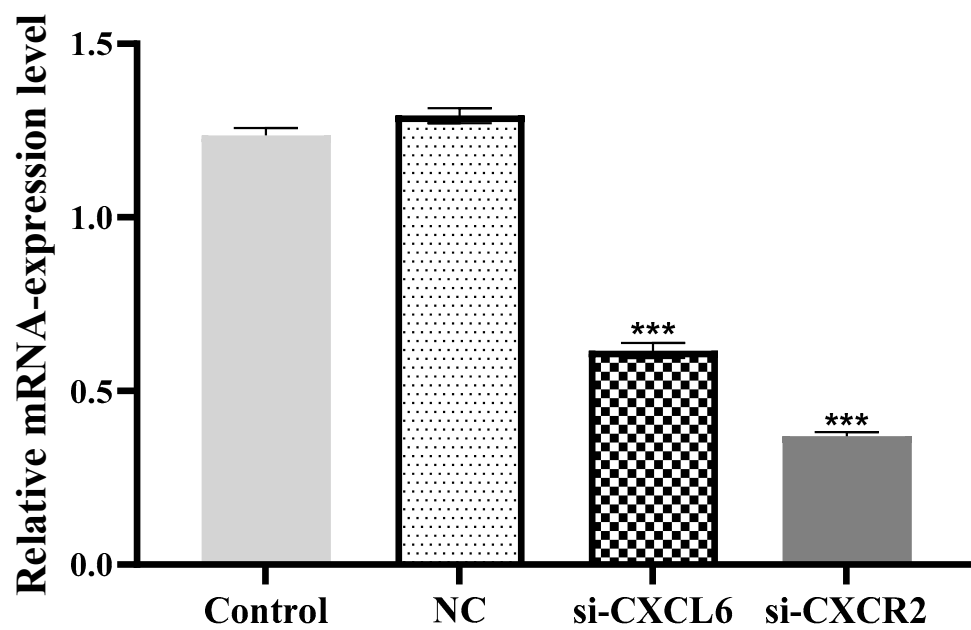

**Supplementary Figure S1.** Effect of siRNA-CXCL6/CXCR2 on CXCL6 and CXCR2 gene expression. Relative gene expression is the ratio of expression relative to that of untreated control and negative control.

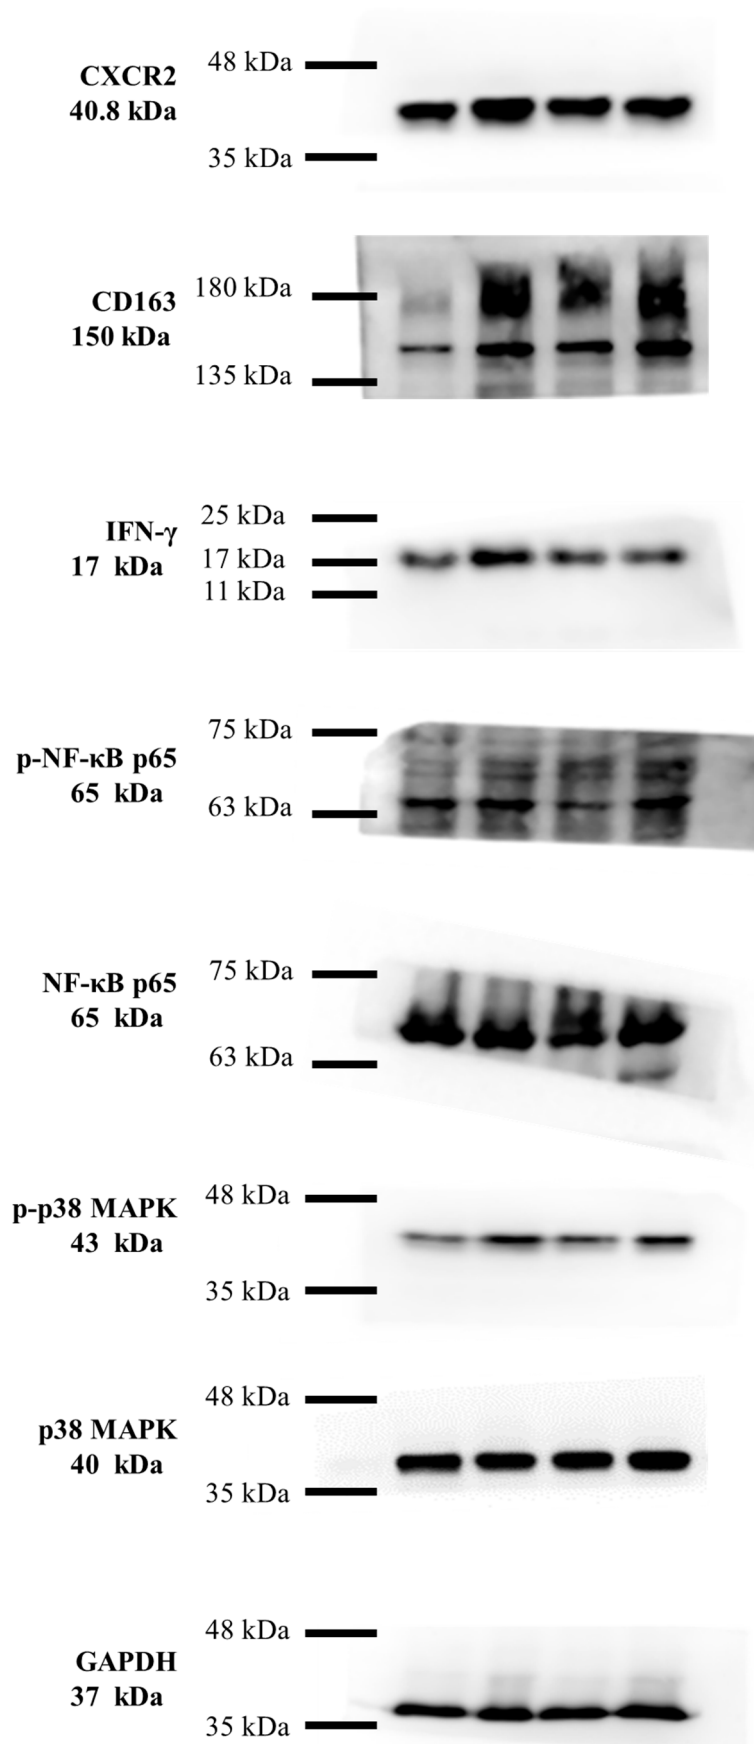

**Supplementary Figure S2.** Full-size blots of Figure 3D

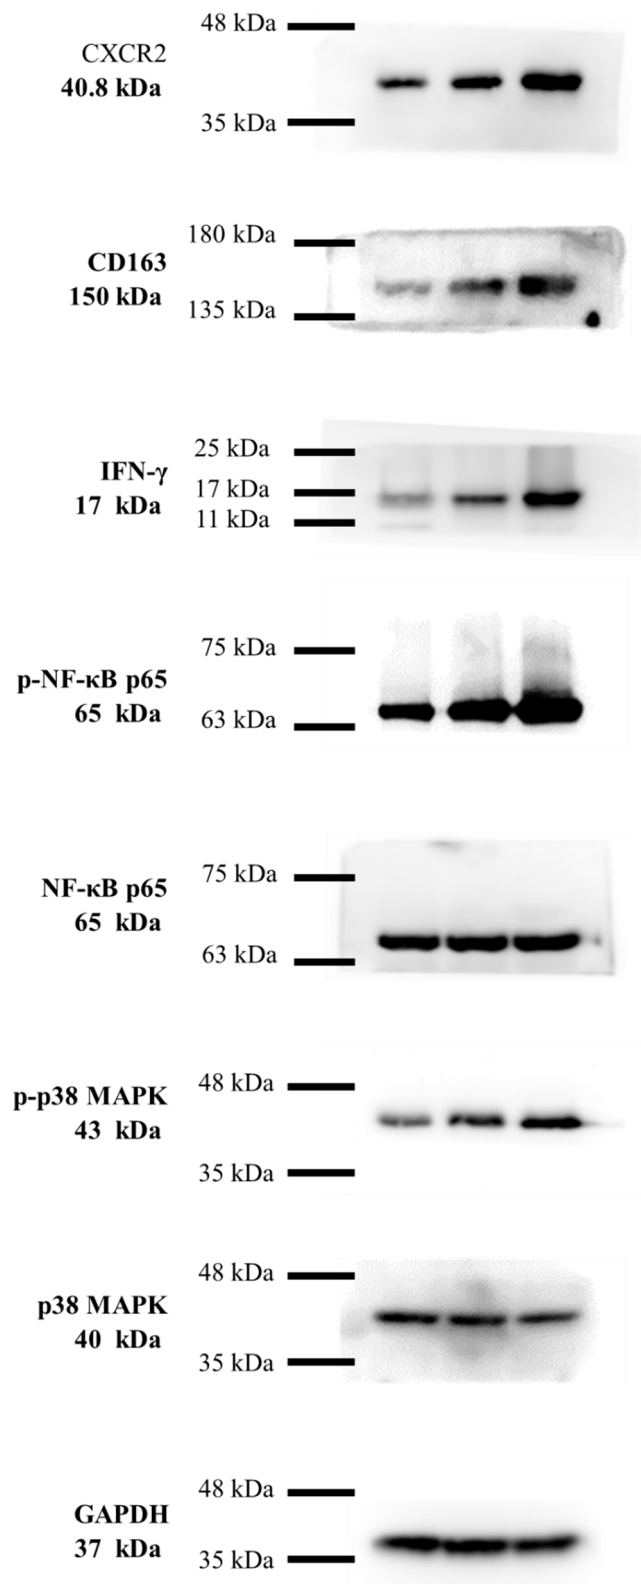

**Supplementary Figure S3.** Full-size blots of Figure 3E

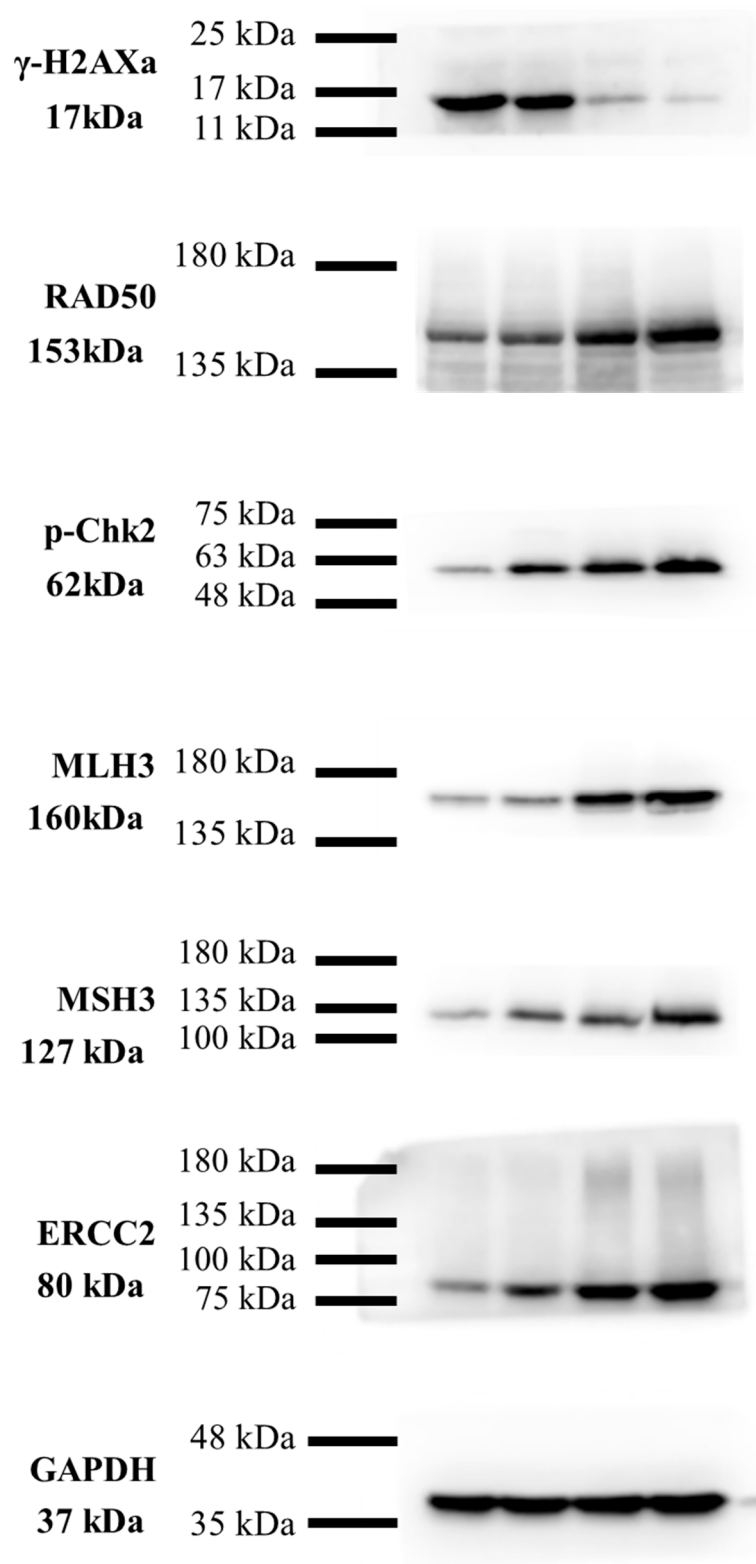

**Supplementary Figure S4.** Full-size blots of Figure 4B

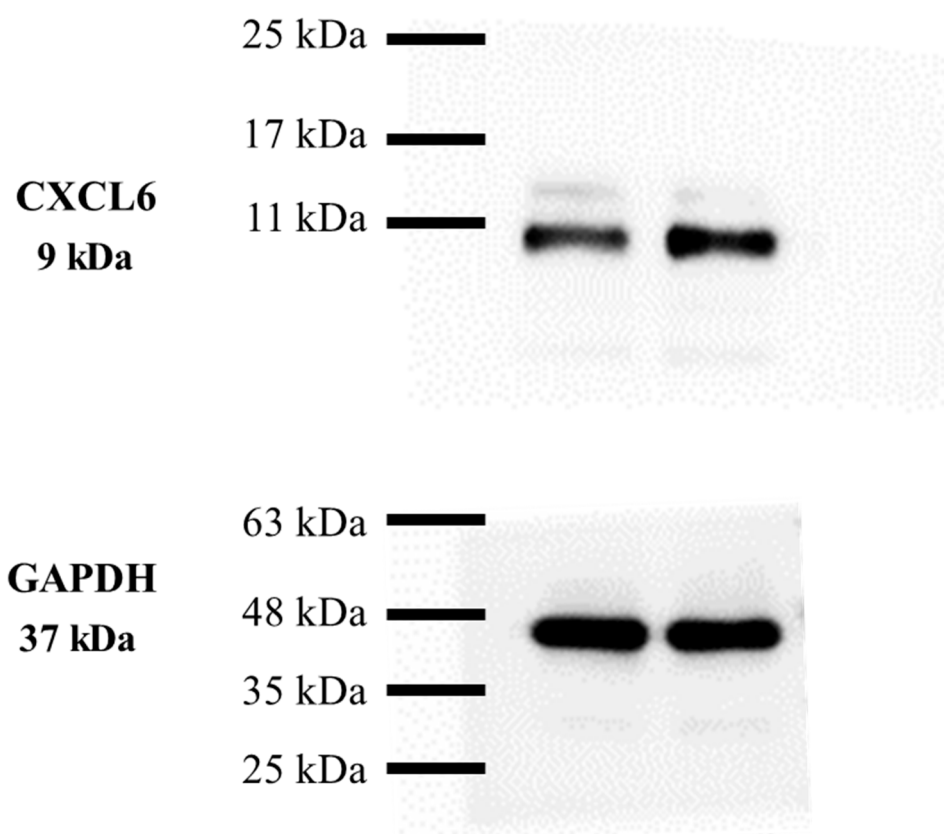

**Supplementary Figure S5.** Full-size blots of Figure 5A
